# Supplementary material for: Exploring polyamine metabolism of the yeast-like fungus, Emergomyces africanus
Source: PubMed Central journal article supplement — FEMS Yeast Res. 2024 Nov 29;24:foae038. doi: 10.1093/femsyr/foae038 (PMC11657236; doi:10.1093/femsyr/foae038), 2024-11-29
Supplement: foae038_supplemental_file.pdf [file foae038_supplemental_file.pdf]

**Supplementary material to:**

**Exploring polyamine metabolism of the yeast-like fungus, *Emergomyces africanus***

*Elizaveta Koroleva<sup>a</sup>, Barbra Toplis<sup>a</sup>, Malcolm Taylor<sup>b</sup>, Corné van Deventer<sup>a</sup>, Heidi C. Steffen<sup>a</sup>, Christiaan van den Heever<sup>a</sup>, Nelesh P. Govender<sup>cdefg</sup>, Sybren de Hoog<sup>h</sup>, Alfred Botha<sup>a</sup>*

<sup>a</sup>*Department of Microbiology, University of Stellenbosch, Stellenbosch, South Africa*

<sup>b</sup>*Mass Spectrometry Unit, Central Analytical Facility, University of Stellenbosch, Stellenbosch, South Africa*

<sup>c</sup>*Centre for Healthcare-Associated Infections, Antimicrobial Resistance and Mycoses, National Institute for Communicable Diseases, a Division of the National Health Laboratory Service, Johannesburg, South Africa*

<sup>d</sup>*Faculty of Health Sciences, University of the Witwatersrand, Johannesburg, South Africa*

<sup>e</sup>*Institute for Infection and Immunity, St George's University of London, London, United Kingdom*

<sup>f</sup>*MRC Centre for Medical Mycology, University of Exeter, Exeter, United Kingdom*

<sup>g</sup>*Division of Medical Microbiology, University of Cape Town, Cape Town, South Africa*

<sup>h</sup>*Medical Microbiology, Radboud University Medical Center, Nijmegen, The Netherlands*

**Corresponding author:** Prof. Alfred Botha, Department of Microbiology, University of Stellenbosch, Private Bag X1, Stellenbosch, South Africa. Email: [abo@sun.ac.za](mailto:abo@sun.ac.za)

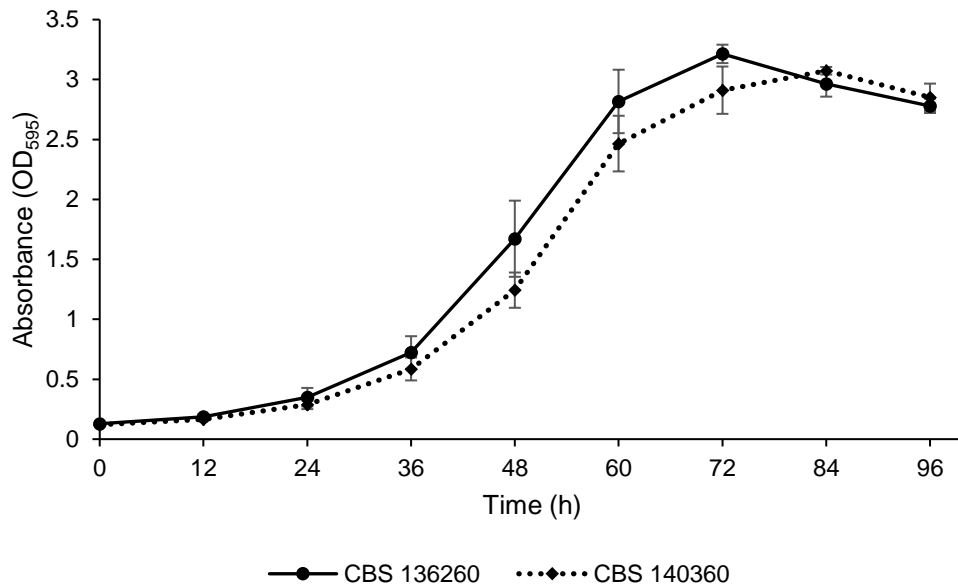

**Figure S1.** Growth of *E. africanus* strains CBS 136260 and CBS 140360 in Brain Heart Infusion broth at 37°C measured by optical density at 595 nm (OD<sub>595</sub>). Growth media were inoculated with ca.  $1 \times 10^7$  yeast-like cells/mL. Values were recorded over a period of 96 hours at 12-hour intervals. Data points represent the average  $\pm$  standard error of three biological replicates ( $n=3$ ).

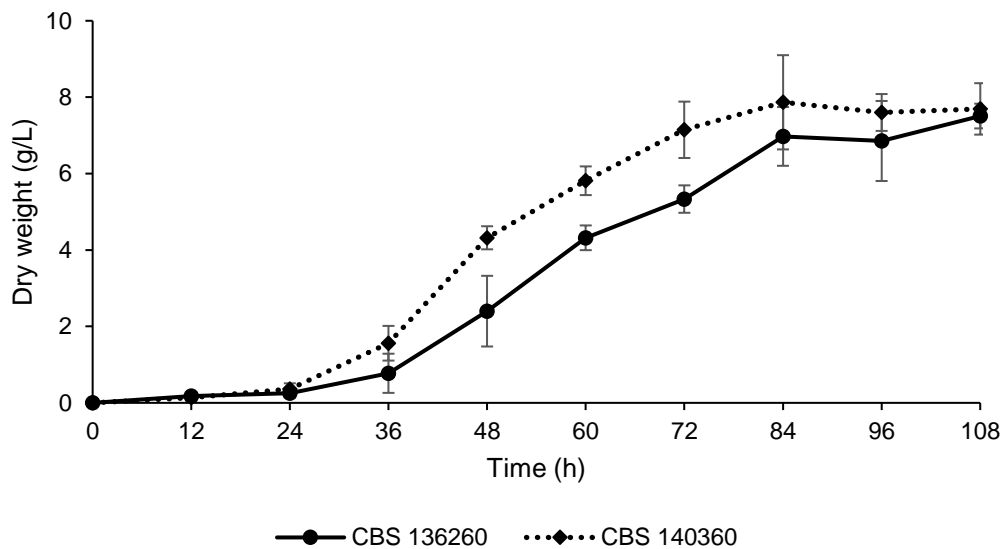

**Figure S2.** Growth of *E. africanus* strains CBS 136260 and CBS 140360 in Brain Heart Infusion broth at 26°C measured by dry weight (g/L). Growth media were inoculated with ca.  $1 \times 10^7$  yeast-like cells/mL. Growth was measured by filtering a sample of the culture medium (2.5 mL) through a pre-weighed Pasteur pipette containing glass wool and drying the retained biomass at 80°C to obtain a measurement of dry weight. Three flasks were used as one biological replicate. Dry weight values were recorded over a period of 108 hours at 12-hour intervals. Data points represent the average  $\pm$  standard error of three biological replicates ( $n=3$ ).

**Figure S3.** Representative multiple reaction monitoring (MRM) chromatograms of cadaverine (A), agmatine (B), putrescine (C), spermidine (D), spermine (E), and the internal standard heptylamine (F) in prepared standards and random samples.

(A)

Standard

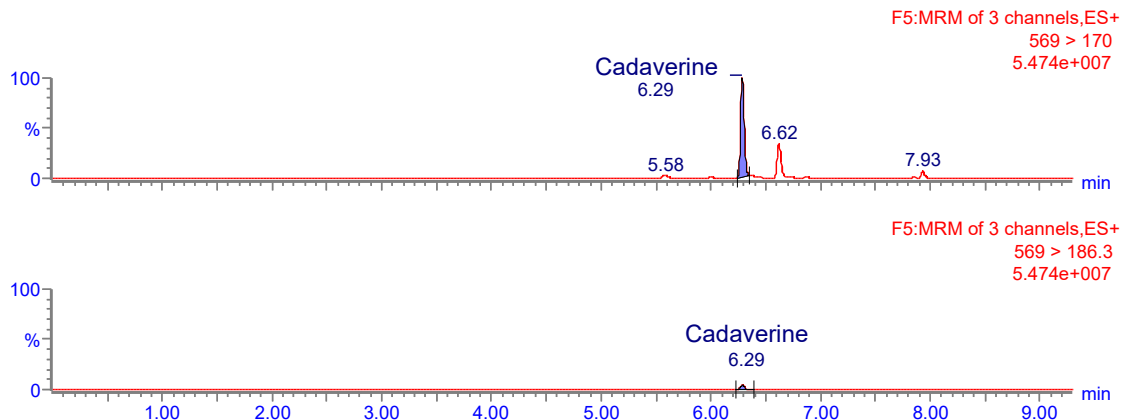

(B)

Standard

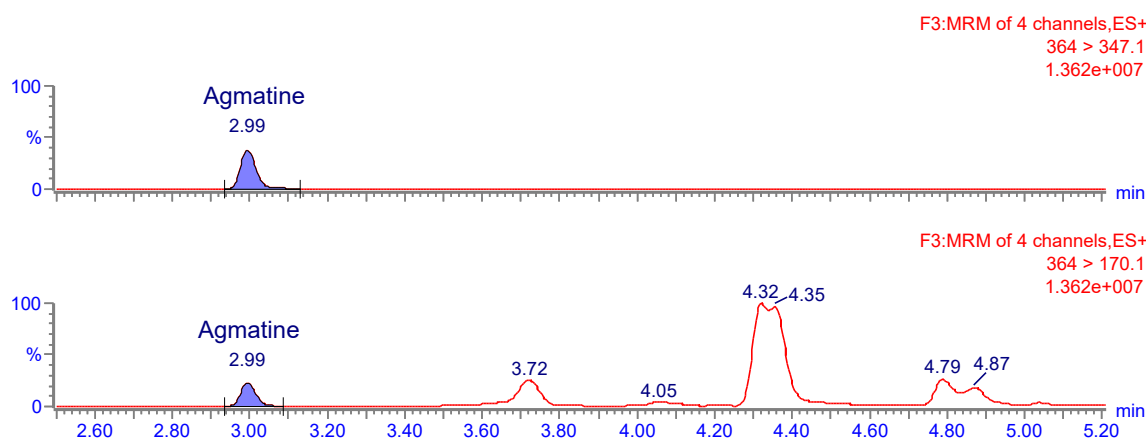

Sample

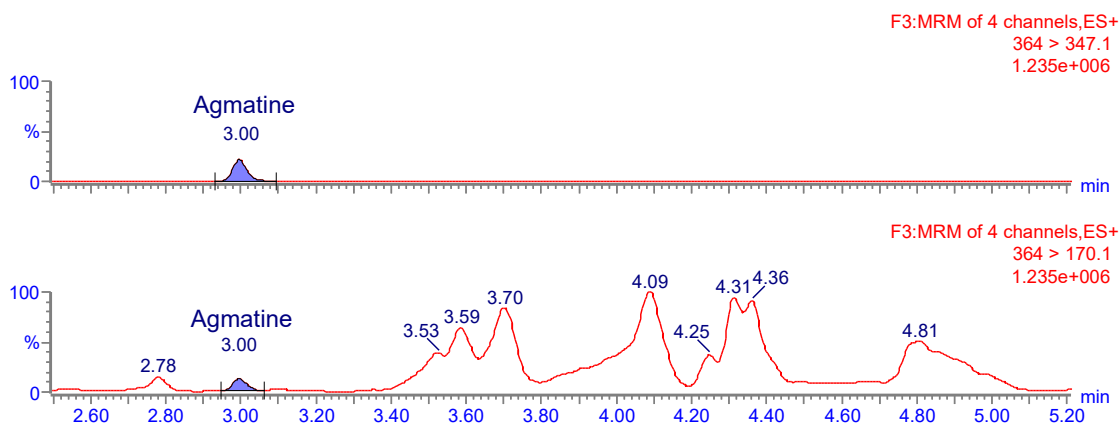

(C)

Standard

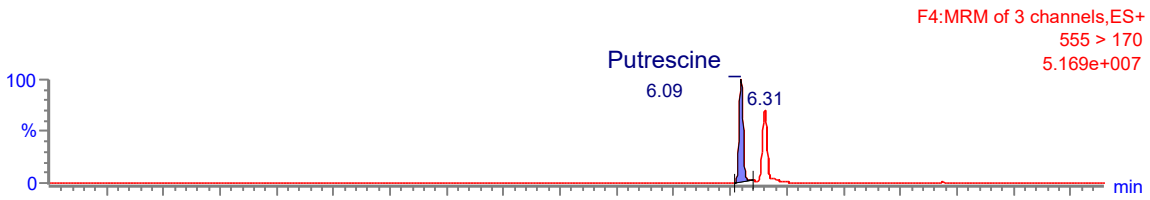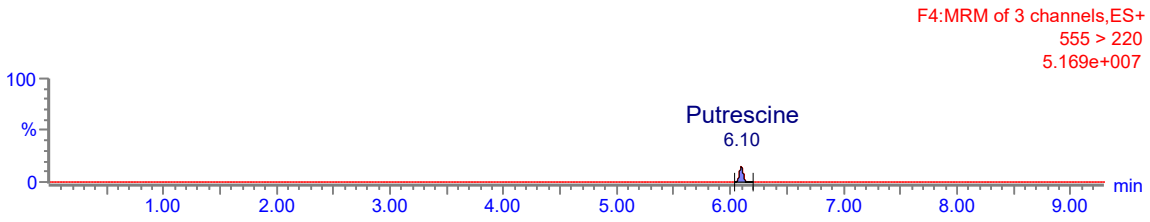

Sample

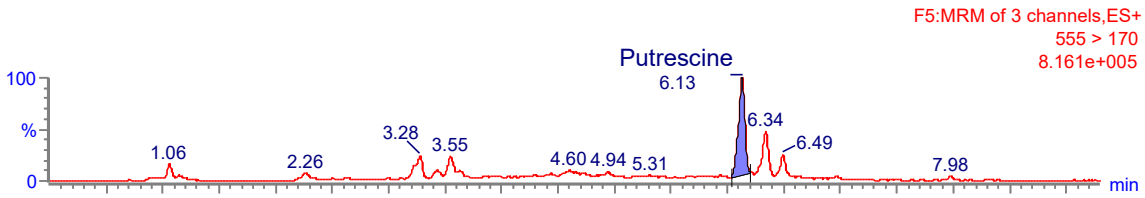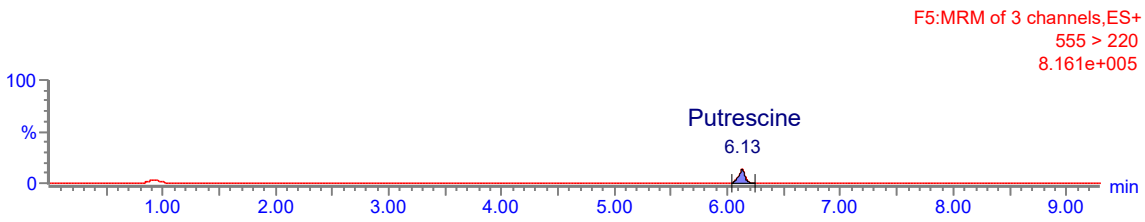

(D)

Standard

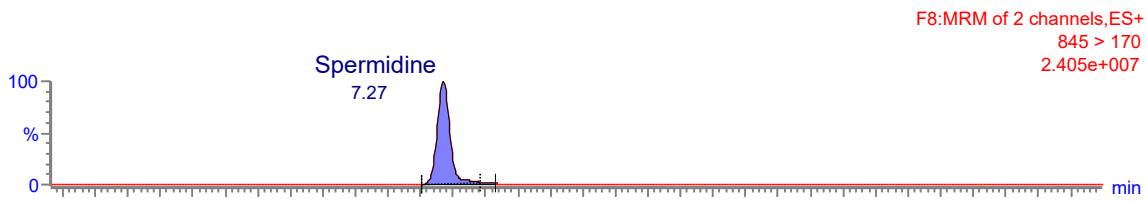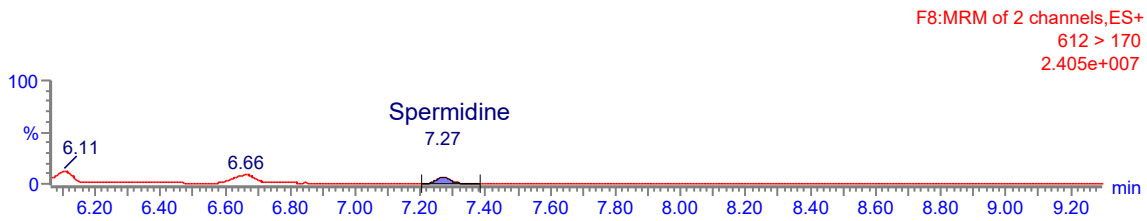

Sample

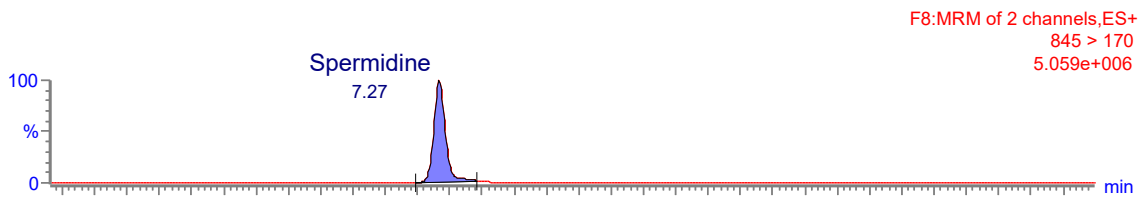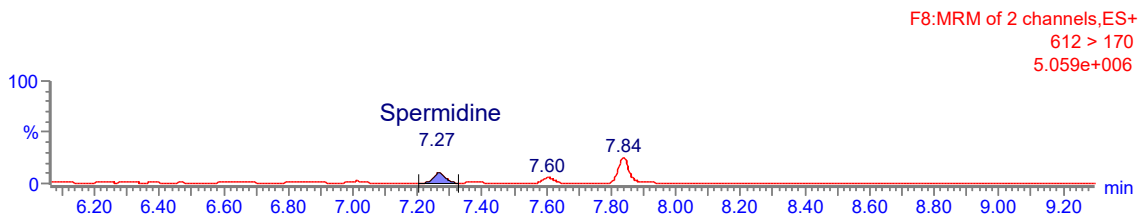

(E)

Standard

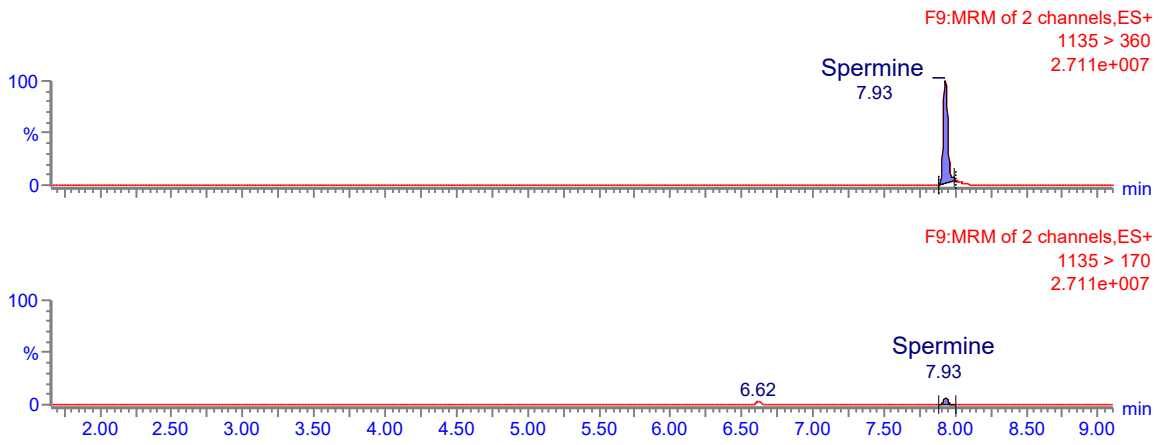

Sample

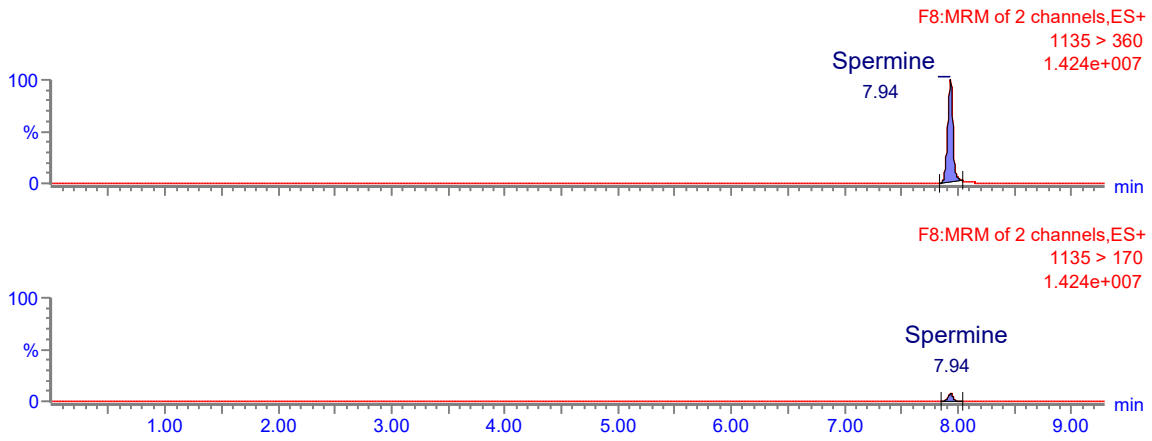

(F)

Standard

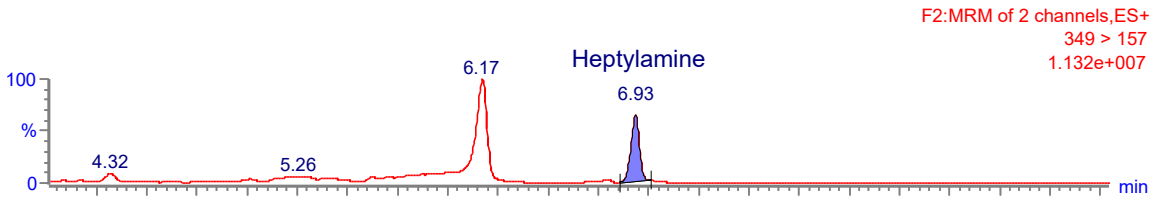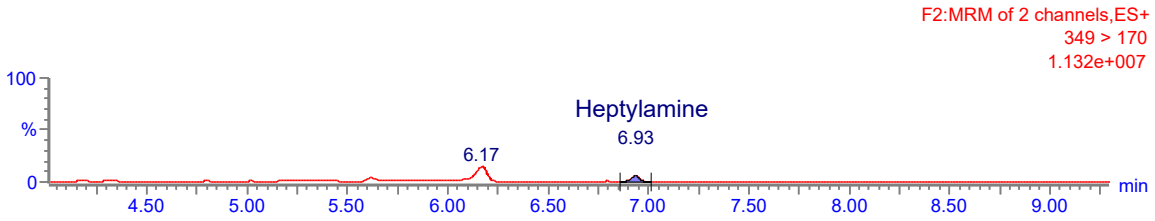

Sample

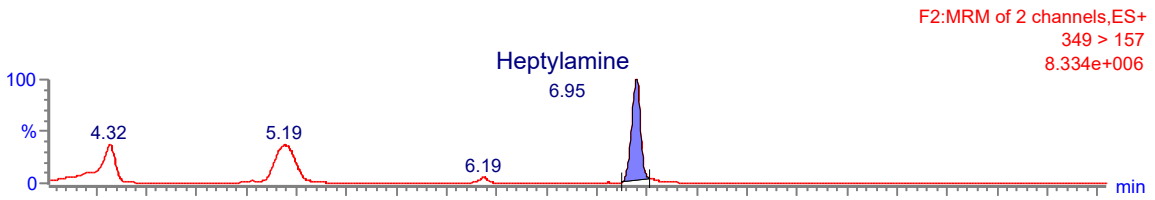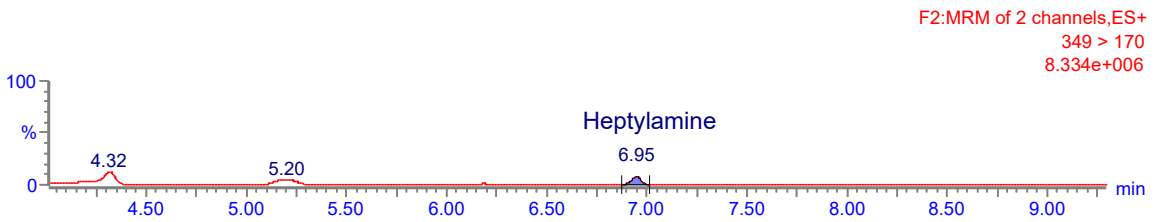

**Table S1.** Linearity and accuracy of polyamine analysis via UPLC-MS/MS.

| Polyamine  | Linear range<br>( $\mu\text{g/L}$ ) | $R^2$ | LOD<br>( $\mu\text{g/L}$ ) | LOQ<br>( $\mu\text{g/L}$ ) | Level 1                      |                 |            | Level 2                      |                 |            | Level 3                      |                 |            |
|------------|-------------------------------------|-------|----------------------------|----------------------------|------------------------------|-----------------|------------|------------------------------|-----------------|------------|------------------------------|-----------------|------------|
|            |                                     |       |                            |                            | Spike<br>( $\mu\text{g/L}$ ) | Recovery<br>(%) | RSD<br>(%) | Spike<br>( $\mu\text{g/L}$ ) | Recovery<br>(%) | RSD<br>(%) | Spike<br>( $\mu\text{g/L}$ ) | Recovery<br>(%) | RSD<br>(%) |
| Agmatine   | 1.0 - 300.0                         | 0.993 | 0.31                       | 1.00                       | 6.00                         | 119.44          | 0.81       | 60.00                        | 111.39          | 4.61       | 240.00                       | 100.01          | 1.02       |
| Cadaverine | 1.0 - 250.0                         | 0.999 | 0.29                       | 1.00                       | 6.00                         | 96.67           | 4.56       | 60.00                        | 100.83          | 3.02       | 240.00                       | 96.94           | 6.74       |
| Putrescine | 1.0 - 300.0                         | 0.995 | 0.16                       | 1.00                       | 6.00                         | 115.00          | 4.35       | 60.00                        | 102.78          | 2.20       | 240.00                       | 97.19           | 3.64       |
| Spermidine | 1.0 - 600.0                         | 0.996 | 0.68                       | 1.00                       | 60.00                        | 94.50           | 8.90       | 240.00                       | 111.22          | 4.03       | 450.00                       | 102.21          | 5.68       |
| Spermine   | 5.0 - 600.0                         | 0.994 | 0.80                       | 5.00                       | 60.00                        | 88.00           | 8.15       | 240.00                       | 105.01          | 5.54       | 450.00                       | 95.33           | 9.32       |

(Abbreviations:  $R^2$ , coefficient of determination; LOD, limit of detection; LOQ, limit of quantification; RSD, relative standard deviation)
